# Supplementary material
Source: Springer Nature journal article supplement (https://www.springermedizin.de/resource/supplementary/12890_2005_39_MOESM4_ESM.pdf/9505836)

rhHGF

E

E

NonE

NonE

ProHGF →  
90-kD

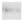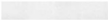

α chain →  
69-kD

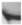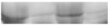

Supplement: MOESM4 [file 9505836]
